# Supplementary material for: Genome-Wide Identification and Transcriptional Expression Analysis of Annexin Genes in Capsicum annuum and Characterization of CaAnn9 in Salt Tolerance
Source: Int J Mol Sci. 2021 Aug 12;22(16):8667. doi: 10.3390/ijms22168667 (PMC8395446; doi:10.3390/ijms22168667)
Supplement: Supplementary file 1 [file ijms-22-08667-s001.zip]

Archive with 4 entries (4 files):
- Supplementary fIgures .pdf
- Table S1.xlsx
- Table S2.xlsx
- Table S3.xlsx
