# Supplementary material for: Genome-Wide Identification and Transcriptional Expression Analysis of Annexin Genes in Capsicum annuum and Characterization of CaAnn9 in Salt Tolerance
Source: Int J Mol Sci. 2021 Aug 12;22(16):8667. doi: 10.3390/ijms22168667 (PMC8395446; doi:10.3390/ijms22168667)
Supplement: Supplementary file 1 [file ijms-22-08667-s001.zip › Table S1.xlsx]

## Sheet: Sheet1
Sample numbers	Remarks	RNA concentration (ng/μl)	A260/A280	A260/A230
1	Leaves	492.35	2.16	2.25
2	Fruit	78.72	2.16	1.58
3	Flower	338.98	2.18	2.23
4	Root	94	2.16	1.79
5	Stem	154.25	2.16	0.72
6	CK-0 h	600.52	2.15	1.4
7	CK-3 h	527.57	2.19	2.22
8	CK-6 h	309.18	2.18	2.04
9	CK-12 h	423.19	2.19	1.35
10	ABA-3h	465.54	2.18	2.27
11	ABA-6h	673.22	2.15	2.28
12	ABA-12h	347.15	2.18	1.77
13	JA-3 h	565.68	2.19	2.12
14	JA-6 h	458.57	2.19	1.33
15	JA-12 h	462.21	2.18	0.97
16	PEG-3 h	607.96	2.18	2.39
17	PEG-6h	501.38	2.18	1.4
18	PEG-12 h	582.13	2.19	1.62
19	NaCl-3 h	487	2.16	2.36
20	NaCl-6h	496.42	2.16	0.8
21	NaCl-12h	579.45	2.19	2.34
22	Cold-3 h	600.67	2.17	2.12
23	Cold-6 h	533.42	2.17	2.25
24	Cold-12 h	487.53	2.17	2.33
