# Supplementary material for: Genome-Wide Identification and Transcriptional Expression Analysis of Annexin Genes in Capsicum annuum and Characterization of CaAnn9 in Salt Tolerance
Source: Int J Mol Sci. 2021 Aug 12;22(16):8667. doi: 10.3390/ijms22168667 (PMC8395446; doi:10.3390/ijms22168667)
Supplement: Supplementary file 1 [file ijms-22-08667-s001.zip › Table S2.xlsx]

## Sheet: Amplication plot and Melt curve
act97							CaAnn1						CaAnn4						CaAnn6						CaAnn8						CaAnn10						CaAnn12						CaAnn14
Pc2							CaAnn3						CaAnn5						CaAnn7						CaAnn9						CaAnn11						CaAnn13						CaAnn15
