# Supplementary material for: Genome-Wide Identification and Transcriptional Expression Analysis of Annexin Genes in Capsicum annuum and Characterization of CaAnn9 in Salt Tolerance
Source: Int J Mol Sci. 2021 Aug 12;22(16):8667. doi: 10.3390/ijms22168667 (PMC8395446; doi:10.3390/ijms22168667)
Supplement: Supplementary file 1 [file ijms-22-08667-s001.zip › Table S3.xlsx]

## Sheet: The primers for pepper CaAnns
CaAnn9	CA08g10470-F	CATCGAGACTGCTTGCACTC
	CA08g10470-R	GGCCCTTCATAACGGTAGGA
CaAnn10	CA08g10480-F	CATCGAGACTGCTTGCACTC
	CA08g10480-R	TCAACTCGTGGCCCTTCATA
CaAnn1	CA01g26520-F	GGGACACAAAACAGAGGCAA
	CA01g26520-R	CTCCCATGGATGCATTGTGT
CaAnn14	CA00g83440-F	gggacagacgaatgggatct
	CA00g83440-R	tcaccatgcccaatcaaagc
CaAnn4	CA00g85100-F	acaactccgatctgccttca
	CA00g85100-R	atccaacgtccacactagca
CaAnn15	CA05g13700-F	GATGCATGCTTGGCTAACGA
	CA05g13700-R	ACGGAAATCCCCAGTTGAGT
CaAnn11	CA08g10490-F	ATCTGGTGCATTGATTCGCC
	CA08g10490-R	GGCTAGTCTTGTTCGCGATG
CaAnn3	CA04g18590-F	AAAGAAGCAGGGCACACTTG
	CA04g18590-R	AAGCCCTTCATTGCCTTGTG
CaAnn7	CA07g20670-F	AAGCAGGACACATTTGGCTG
	CA07g20670-R	TGTCCCCAAGCCCTTCATAG
CaAnn6	CA07g10540-F	TACCCACAAGTAGCAATGCG
	CA07g10540-R	ATCTTCAGATCGACCTCCCC
CaAnn13	CA11g14100-F	TGGAAGCAGTCATGTTGTGG
	CA11g14100-R	TTGTCTCACCGCGATCAGAT
CaAnn12	CAN.G134.117-F	AGGCTTTCTCAGGACTTGGTG
	CAN.G134.117-R	TTGGCGCTCGTCTTCTTTG
CaAnn8	CAN.G134.113-F	CTGTGGAAAAGGTCTGCTGG
	CAN.G134.113-R	CAACTTCAGCTCGCGTTACA
CaAnn5	CAN.G966.1-F	CTTGCCCATCGTGATACAGC
	CAN.G966.1-R	GATCAGCAACAACGCCACTC
	act97-F	cctgaggtgcttttccaacc		tr|A0A1U8GLU9|A0A1U8GLU9_CAPAN	actin-97 OS=Capsicum annuum GN=LOC107870208 PE=3 SV=1
	act97-R	cagcaatacccgggaacatg
	Pc2-F	tcatatccgaactcccagcc		tr|A0A1U8FFX4|A0A1U8FFX4_CAPAN	phosphoenolpyruvate carboxylase OS=Capsicum annuum GN=LOC107854728 PE=3 SV=1
	Pc2-R	cagcatccagatcagccaac

## Sheet: The primers for VIGS vector
pTRV2：CaAnn9 FP	ATTCTGTGAGTAAGGTTACCaaatggaatcgccatcaga
pTRV2：CaAnn9 RP	TTTAATGTCTTCGGGACATGGgtgggcgatgtcctcc
pTRV2：CaPDS FP	ATTCTGTGAGTAAGGTTACCcccaaccaaaccactggaga
pTRV2：CaPDS RP	TTTAATGTCTTCGGGACATGGcttcggggaaatcaaagcg
pTRV2 FP	AAATGGAATCGCCATCAGA
pTRV2 RP	GGACTTTGAATATGGTGGGC
pTRV1 FP	AACAAGCCATGAAAACCGCC
pTRV1 RP	GGAGAAAACTCACCGAGGCA
CaActin FP	ACTCTTAATCAATCCCTCC
CaActin RP	GCACTGTATGACTGACACC
CaAnnD4(RT-PCR) FP	AATTGAGGAGGACATCGCCC
CaAnnD4(RT-PCR) RP	TTGCAGGCAAGGTAGTTCCA
